# Supplementary material
Source: MDPI journal article supplement (https://www.mdpi.com/1424-8247/16/8/1118)
Supplement: s1 [file s1]

Figure S1:  $^1\text{H}$ -NMR of compound SPK1

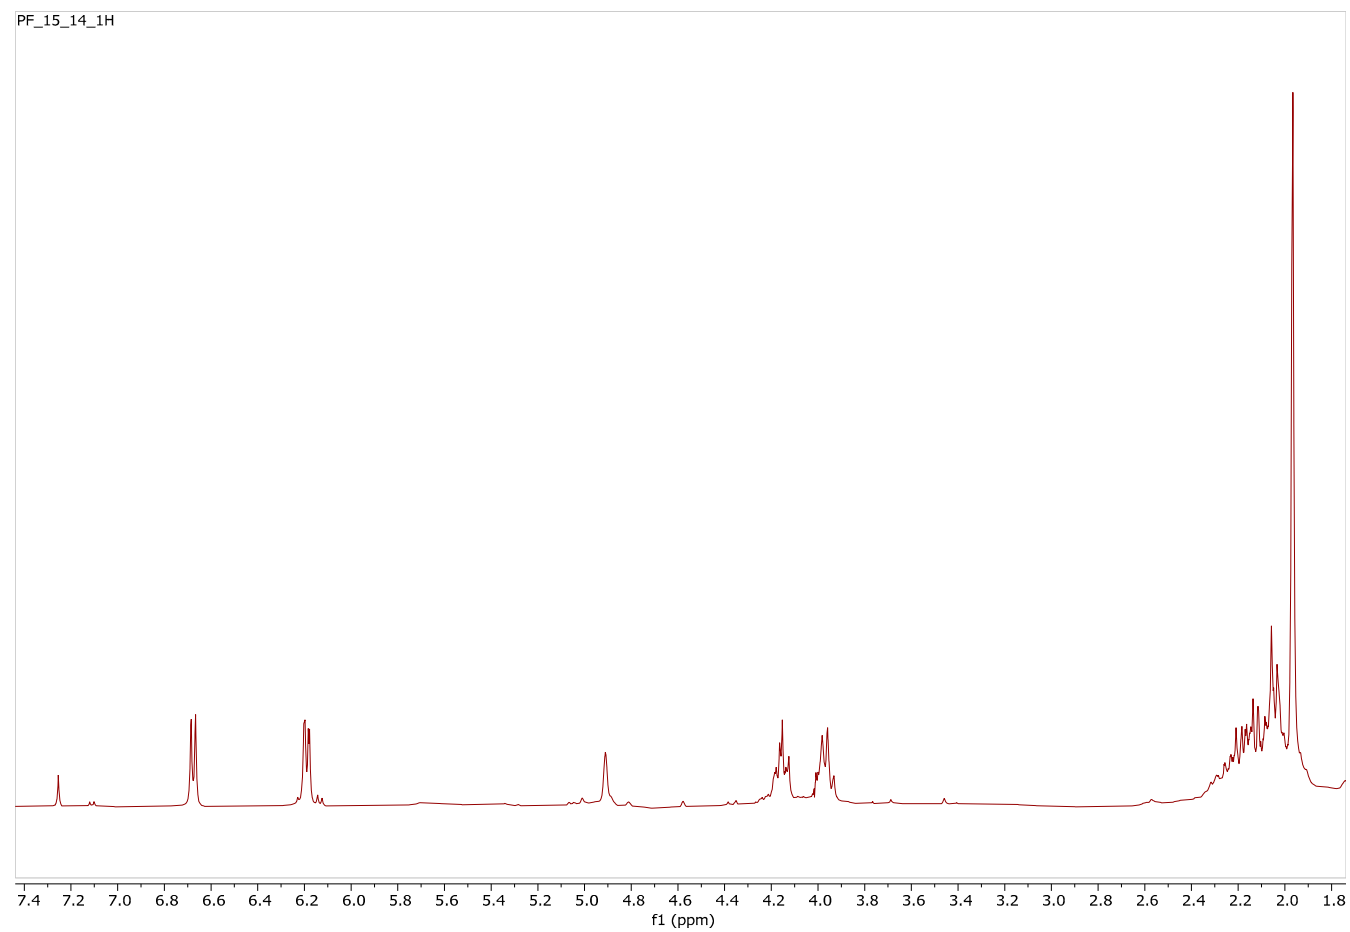

Figure S2:  $^1\text{H}$ - $^{13}\text{C}$  HSCQ of compound SPK1

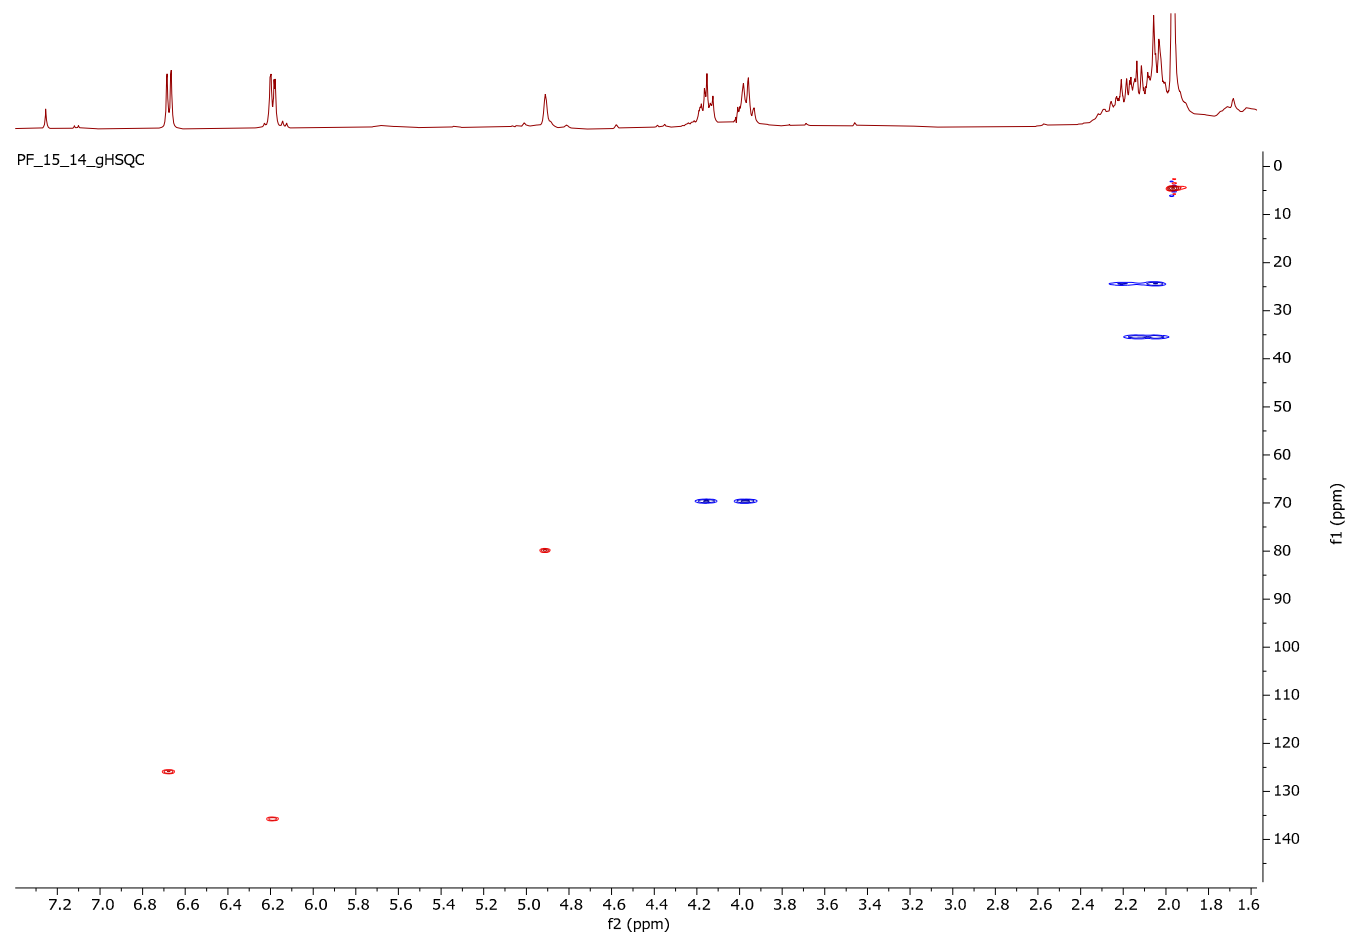

Figure S3:  $^1\text{H}$ -NMR of compound SPK2

PF\_19\_3\_1H

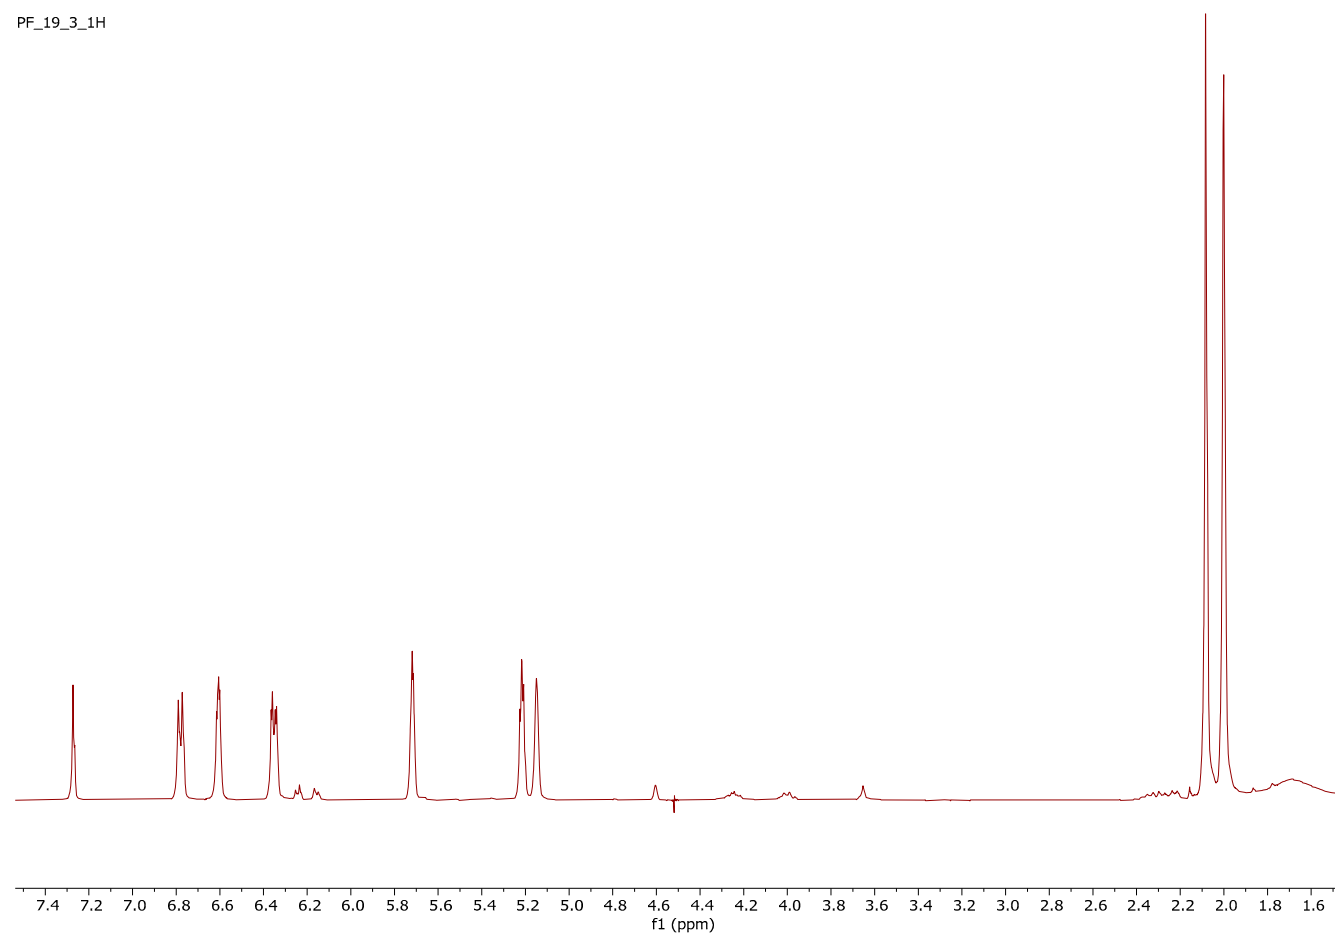

Figure S4:  $^{13}\text{C}$ -NMR of compound SPK2

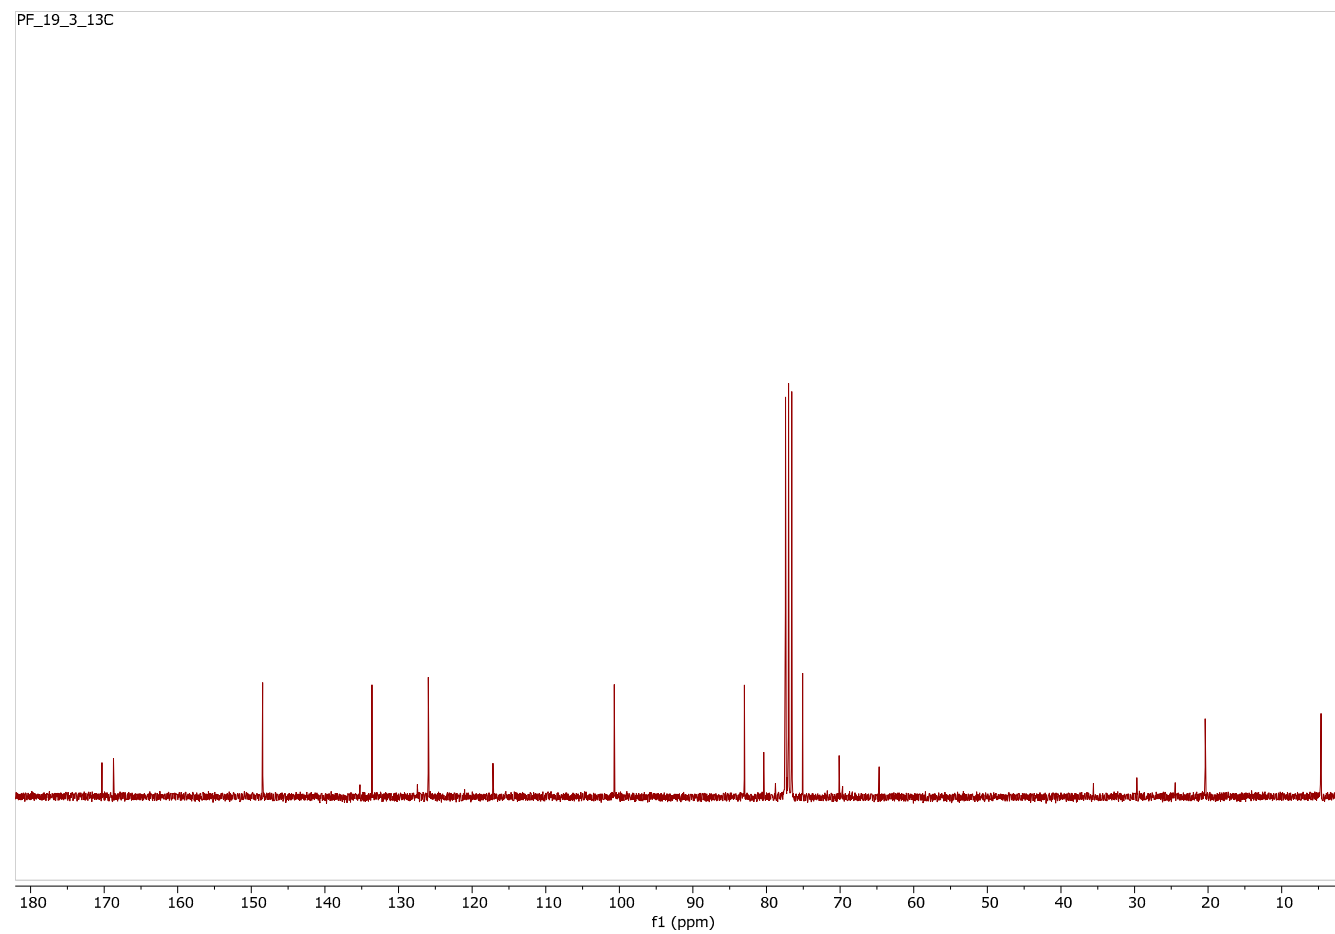

Figure S5:  $^1\text{H}$ -NMR of compound SPK3

PF\_20\_2\_1H

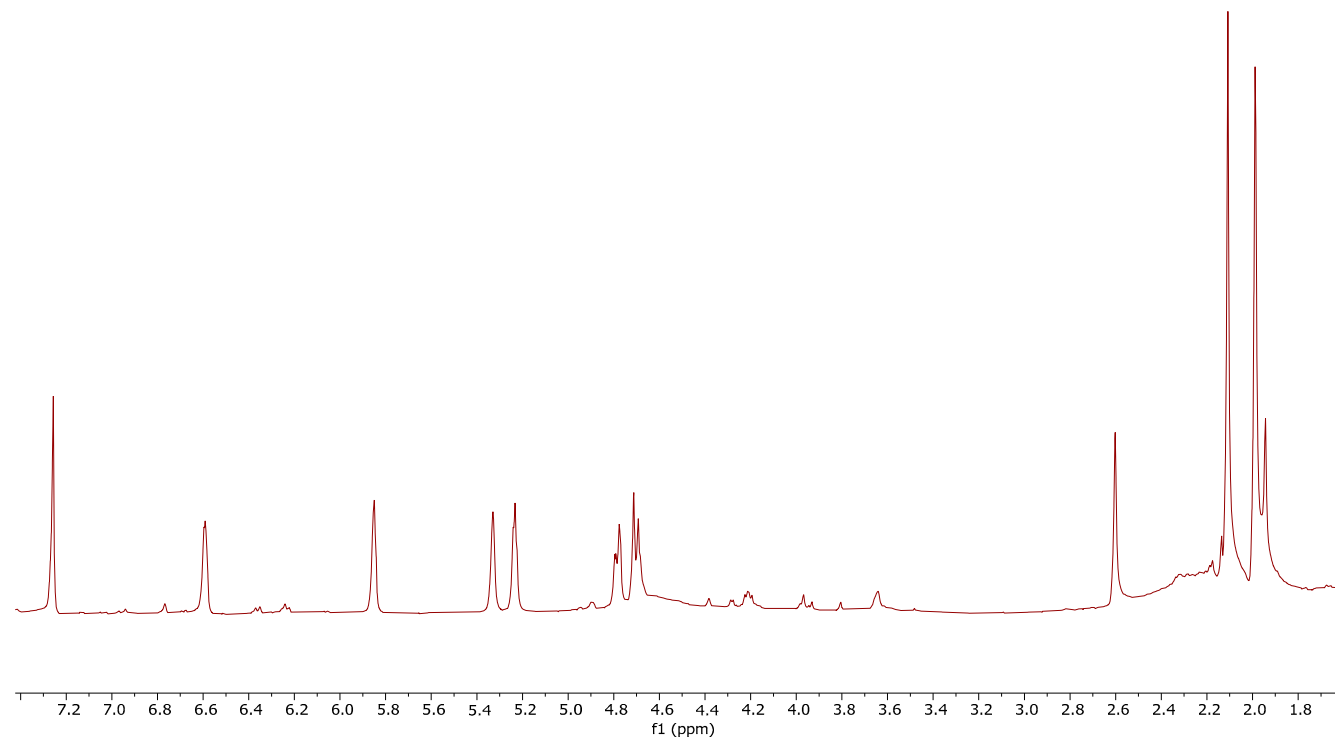

**Table S1.** NMR data of compounds SPK1-SPK3 recorded in CDCl<sub>3</sub> compared with NMR data reported for SPK1 [34], SPK2 [35], SPK3 [26].

| Position           | SPK1                    |                         |                                        |                           | SPK2                    |                         |                                        |                           | SPK3                    |                         |                                        |                           |
|--------------------|-------------------------|-------------------------|----------------------------------------|---------------------------|-------------------------|-------------------------|----------------------------------------|---------------------------|-------------------------|-------------------------|----------------------------------------|---------------------------|
|                    | $\delta_c$ (type)       | $\delta_H$<br>(J in Hz) | $\delta_c$ (type) <sup>1</sup><br>[34] | $\delta_H^1$<br>(J in Hz) | $\delta_c$ (type)       | $\delta_H$<br>(J in Hz) | $\delta_c$ (type) <sup>2</sup><br>[35] | $\delta_H^2$<br>(J in Hz) | $\delta_c$ (type)       | $\delta_H$<br>(J in Hz) | $\delta_c$ (type) <sup>3</sup><br>[26] | $\delta_H^3$<br>(J in Hz) |
| 1                  | 4.53 (CH <sub>3</sub> ) | 1.97 s                  | 5.0                                    | 1.98 s                    | 4.78 (CH <sub>3</sub> ) | 1.99 s                  | 4.03                                   | 1.98 s                    | 4.53 (CH <sub>3</sub> ) | 1.97 s                  | 4.0                                    | 1.48 s                    |
| 2                  | 79.9 (C)                | -                       | 80.0                                   | -                         | 80.4 (C)                | -                       | 80.15                                  | -                         | 79.9 (C)                | -                       | 82.5                                   | -                         |
| 3                  | 65.0 (C)                | -                       | 65.4                                   | -                         | 64.7 (C)                | -                       | 64.52                                  | -                         | 64.8 (C)                | -                       | 65.7                                   | -                         |
| 4                  | 76.3 (C)                | -                       | 76.9                                   | -                         | 77.5(C)                 | -                       | 77.27                                  | -                         | 76.3 (C)                | -                       | 81.6                                   | -                         |
| 5                  | 71.3 (C)                | -                       | 71.9                                   | -                         | 70.1 (C)                | -                       | 69.88                                  | -                         | 67.5 (C)                | -                       | 68.3                                   | -                         |
| 6                  | 79.9 (CH)               | 4.91 brs                | 80.3                                   | 4.92 s                    | 83.0 (CH)               | 5.14 brs                | 82.15                                  | 5.13 brs                  | 87.0 (CH)               | 5.30 br s               | 87.7                                   | 5.39 brs                  |
| 7                  | 168.9 (C)               | -                       | 169.2                                  | -                         | 168.7 (C)               | -                       | 168.54                                 | -                         | 164.7 (C)               | -                       | 164.9                                  | -                         |
| 8                  | 125.9 (CH)              | 6.68 d (5.7)            | 126.3                                  | 6.68 d (5.9)              | 125.9 (CH)              | 6.77 d (5.4)            | 125.27                                 | 6.76 d (5.7)              | 57.3 (CH)               | 4.78 d (6.0)            | 57.7                                   | 4.69 dd (1.8, 6.5)        |
| 9                  | 135.8 (CH)              | 6.20 dd (1.8, 5.7)      | 136.2                                  | 6.21 dd (1.71, 5.9)       | 133.6 (CH)              | 6.34 dd (1.8, 5.4)      | 133.79                                 | 6.34 dd (1.8, 5.7)        | 80.8 (CH)               | 4.68 d (6.0)            | 81.4                                   | 4.73 brs                  |
| 10                 | 120.6 (C)               | -                       | 121.2                                  | -                         | 117.2 (C)               | -                       | 116.86                                 | -                         | 110.5 (C)               | -                       | 110.7                                  | -                         |
| 11                 | 35.5(CH <sub>2</sub> )  | 2.04 ov<br>2.15 ov      | 35.9                                   | 2.07-2.13 m               | 75.1 (CH)               | 5.70 brs                | 74.74                                  | 5.70 dd (2.0, 2.0)        | 75.4 (CH)               | 5.82 brs                | 35.9                                   | 2.07-2.13 m               |
| 12                 | 24.5(CH <sub>2</sub> )  | 2.05 ov<br>2.20 ov      | 24.9                                   | 2.07-2.17 m               | 100.7 (CH)              | 5.20 dd (2.7, 3.0)      | 100.38                                 | 5.20 dd (2.8, 2.8)        | 101.9 (CH)              | 5.20 brs                | 24.9                                   | 2.07-2.17 m               |
| 13                 | 69.8(CH <sub>2</sub> )  | 3.97 m<br>4.16 m        | 70.1                                   | 3.98-4.17 m               | 148.5 (CH)              | 6.59 dd (1.8, 3.0)      | 148.03                                 | 6.59 dd (3.1, 3.1)        | 147.9 (CH)              | 6.58 brs                | 70.1                                   | 3.98-4.17 m               |
| OCOCH <sub>3</sub> | -                       | -                       | -                                      | -                         | 20.4 (CH <sub>3</sub> ) | 2.07 s                  | 19.79(CH <sub>3</sub> )                | 2.06 s                    | 20.5(CH <sub>3</sub> )  | 2.10 s                  | 19.9(CH <sub>3</sub> )                 | 1.72 s                    |
| OCOCH <sub>3</sub> | -                       | -                       | -                                      | -                         | 170.3 (C)               | -                       | 169.66 (C)                             | -                         | 170.7 (C)               | -                       | 170.2 (C)                              | -                         |

brs = broad singlet; d = doublet; dd = doublet of doublets; m = multiplet; ov = overlapped; s = singlet;  $\delta$  in ppm; J values (Hz) are reported in brackets<sup>1</sup> as reported by Buono-Core et al. 2011 [34]<sup>2</sup> as reported by Maqua et al. 1988 [35]<sup>3</sup> as reported by Casu et al. 2006 [26]
